# Supplementary material
Source: publisher site journal article supplement (https://kjim.org/upload/media/kjim-2024-343-Supplementary-Fig-2.pdf)
Supplement: Supplementary file 1 [file kjim-2024-343-Supplementary-Fig-2.pdf]

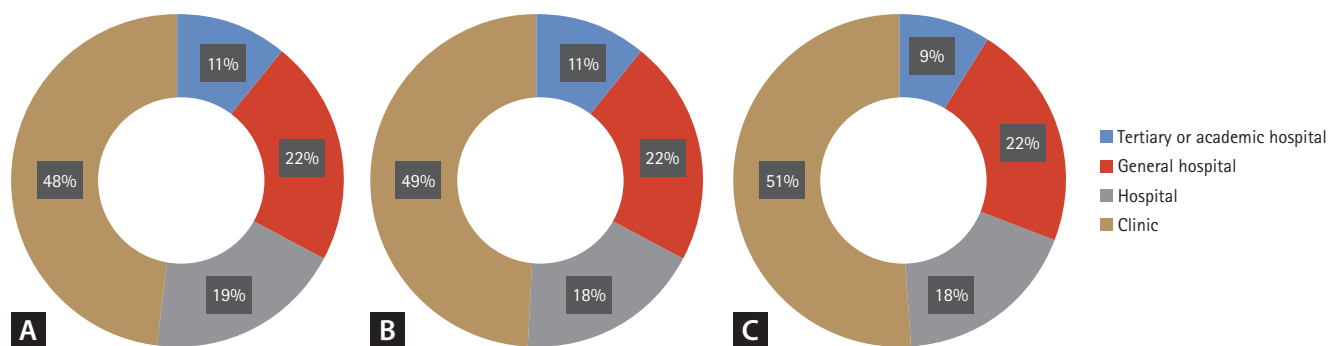

**Supplementary Figure 2.** Number of lower gastrointestinal endoscopies performed in Korea according to type of medical institution. (A) Total. (B) Diagnostic lower gastrointestinal endoscopies. (C) Therapeutic lower gastrointestinal endoscopies.
